# Supplementary material for: Chemoselective methylene oxidation in aromatic molecules
Source: Springer Nature journal article supplement (doi:10.1038/s41557-018-0175-8), 2018-12-10
Supplement: 41557_2018_175_MOESM10_ESM.mol [file 41557_2018_175_MOESM10_ESM.mol]

nchem.18081731A-comp5.mol
  ChemDraw10191811062D

 45 43  0  0  0  0  0  0  0  0999 V2000
    3.6720    1.1552    0.0000 Sb  0  5  0  0  0  0  0  0  0  0  0  0
    4.3840    0.7441    0.0000 F   0  0  0  0  0  0  0  0  0  0  0  0
    4.3840    1.5663    0.0000 F   0  0  0  0  0  0  0  0  0  0  0  0
    3.6720    1.9774    0.0000 F   0  0  0  0  0  0  0  0  0  0  0  0
    2.9599    1.5663    0.0000 F   0  0  0  0  0  0  0  0  0  0  0  0
    2.9599    0.7441    0.0000 F   0  0  0  0  0  0  0  0  0  0  0  0
    3.6720    0.3330    0.0000 F   0  0  0  0  0  0  0  0  0  0  0  0
    3.6720   -1.0794    0.0000 Sb  0  5  0  0  0  0  0  0  0  0  0  0
    4.3840   -1.4905    0.0000 F   0  0  0  0  0  0  0  0  0  0  0  0
    4.3840   -0.6683    0.0000 F   0  0  0  0  0  0  0  0  0  0  0  0
    3.6720   -0.2572    0.0000 F   0  0  0  0  0  0  0  0  0  0  0  0
    2.9599   -0.6683    0.0000 F   0  0  0  0  0  0  0  0  0  0  0  0
    2.9599   -1.4905    0.0000 F   0  0  0  0  0  0  0  0  0  0  0  0
    3.6720   -1.9016    0.0000 F   0  0  0  0  0  0  0  0  0  0  0  0
   -0.2810   -2.8646    0.0000 C   0  0  0  0  0  0  0  0  0  0  0  0
   -0.9936   -3.2804    0.0000 C   0  0  0  0  0  0  0  0  0  0  0  0
   -1.7100   -2.8713    0.0000 C   0  0  0  0  0  0  0  0  0  0  0  0
   -1.7138   -2.0463    0.0000 C   0  0  0  0  0  0  0  0  0  0  0  0
   -2.3207   -1.5714    0.0000 C   0  0  0  0  0  0  0  0  0  0  0  0
   -3.0289    0.8525    0.0000 N   0  0  0  0  0  0  0  0  0  0  0  0
   -3.2749    1.6400    0.0000 C   0  0  0  0  0  0  0  0  0  0  0  0
   -4.0998    1.6494    0.0000 C   0  0  0  0  0  0  0  0  0  0  0  0
   -4.3637    0.8677    0.0000 C   0  0  0  0  0  0  0  0  0  0  0  0
   -3.7018    0.3752    0.0000 C   0  0  0  0  0  0  0  0  0  0  0  0
   -3.7111   -0.4497    0.0000 C   0  0  0  0  0  0  0  0  0  0  0  0
   -3.0492   -0.9422    0.0000 N   0  0  0  0  0  0  0  0  0  0  0  0
   -2.3207    1.5799    0.0000 C   0  0  0  0  0  0  0  0  0  0  0  0
   -1.7051    2.0395    0.0000 C   0  0  0  0  0  0  0  0  0  0  0  0
   -0.9887    1.6304    0.0000 N   0  0  0  0  0  0  0  0  0  0  0  0
   -0.2762    2.0463    0.0000 C   0  0  0  0  0  0  0  0  0  0  0  0
   -0.2801    2.8713    0.0000 C   0  0  0  0  0  0  0  0  0  0  0  0
   -0.9966    3.2804    0.0000 C   0  0  0  0  0  0  0  0  0  0  0  0
   -1.7091    2.8645    0.0000 C   0  0  0  0  0  0  0  0  0  0  0  0
   -3.3131   -1.7239    0.0000 C   0  0  0  0  0  0  0  0  0  0  0  0
   -4.1380   -1.7145    0.0000 C   0  0  0  0  0  0  0  0  0  0  0  0
   -4.3840   -0.9270    0.0000 C   0  0  0  0  0  0  0  0  0  0  0  0
   -1.0013   -1.6304    0.0000 N   0  0  0  0  0  0  0  0  0  0  0  0
   -0.2849   -2.0396    0.0000 C   0  0  0  0  0  0  0  0  0  0  0  0
    0.5918    0.6157    0.0000 N   0  0  0  0  0  0  0  0  0  0  0  0
    1.4141    0.6157    0.0000 C   0  0  0  0  0  0  0  0  0  0  0  0
    2.2363    0.6157    0.0000 C   0  0  0  0  0  0  0  0  0  0  0  0
    0.5918   -0.5495    0.0000 N   0  0  0  0  0  0  0  0  0  0  0  0
    1.4141   -0.5495    0.0000 C   0  0  0  0  0  0  0  0  0  0  0  0
    2.2363   -0.5495    0.0000 C   0  0  0  0  0  0  0  0  0  0  0  0
   -0.9867    0.0031    0.0000 Mn  0  2  0  0  0  0  0  0  0  0  0  0
  1  2  1  0      
  1  3  1  0      
  1  4  1  0      
  1  5  1  0      
  1  6  1  0      
  1  7  1  0      
  8  9  1  0      
  8 10  1  0      
  8 11  1  0      
  8 12  1  0      
  8 13  1  0      
  8 14  1  0      
 15 16  2  0      
 16 17  1  0      
 17 18  2  0      
 18 19  1  0      
 19 20  1  0      
 20 21  1  0      
 21 22  1  0      
 22 23  1  0      
 20 24  1  0      
 23 24  1  0      
 24 25  1  0      
 25 26  1  0      
 26 27  1  0      
 27 28  1  0      
 28 29  2  0      
 29 30  1  0      
 30 31  2  0      
 31 32  1  0      
 32 33  2  0      
 28 33  1  0      
 26 34  1  0      
 34 35  1  0      
 35 36  1  0      
 25 36  1  0      
 18 37  1  0      
 37 38  2  0      
 15 38  1  0      
 39 40  3  0      
 40 41  1  0      
 42 43  3  0      
 43 44  1  0      
M  CHG  3   1  -1   8  -1  45   2
M  END
